# Supplementary material for: Epitaxial growth of hexahedral Fe2O3@SnO2 nano-heterostructure for improved lithium-ion batteries
Source: Royal Society of Chemistry journal article supplement (doi:10.1039/d3dt00960b), 2023-01-01
Supplement: d3dt00960b1.pdf [file d3dt00960b1.pdf]

# Supporting Information

## Epitaxial Growth of Hexahedral Fe<sub>2</sub>O<sub>3</sub>@SnO<sub>2</sub> Nano Heterostructure for Improved Lithium-Ion Battery

Xiong Wang<sup>a</sup>, Rui Wang<sup>a\*</sup>, Qiaoling Kang<sup>a\*</sup>, Feng Gao<sup>b</sup>, Miaogen Chen<sup>d</sup>, Yang Xu<sup>a</sup>,

Hongliang Ge<sup>ac</sup>, Dongyun Li<sup>ac\*</sup>

<sup>a</sup> College of Materials and Chemistry, China Jiliang University, Hangzhou, 310018, China.

<sup>b</sup> Department of Materials Science and Engineering, Jiangsu Key Laboratory of Artificial Functional Materials, Collaborative Innovation Center of Advanced Microstructures, College of Engineering and Applied Sciences, Nanjing University, Nanjing 210023, PR China.

<sup>c</sup> Magnetism Key Laboratory of Zhejiang Province, China Jiliang University, Hangzhou 310018, China

<sup>d</sup> Department of Physics, China Jiliang University, Hangzhou 310018, PR China

\*Corresponding Authors:

E-mail: wangrui@cjlu.edu.cn

E-mail: kangqiaoling@cjlu.edu.cn

E-mail: lidongyun@cjlu.edu.cn

## Content

**Fig. S1.** SEM images of (a-b) hexahedral Fe<sub>2</sub>O<sub>3</sub> cubes; (c-d) SnO<sub>2</sub> nanopillars

**Fig. S2.** The survey spectra of the hexahedral Fe<sub>2</sub>O<sub>3</sub>@SnO<sub>2</sub> heterostructure.

**Fig. S3.** CV curves of initial three cycles at scan rate 0.1 mV s<sup>-1</sup> of (a) hexahedral Fe<sub>2</sub>O<sub>3</sub> heterostructure;(b) SnO<sub>2</sub> nanopillars.

**Fig. S4.** The equivalent circuit of the three samples.

**Table S1.** Key parameters in the mechanical and electrochemical simulations

**Table S2.** Hexahedral Fe<sub>2</sub>O<sub>3</sub>@SnO<sub>2</sub> heterostructure and other Fe-based anode reported in other recent literatures are used to LIBs' anode.

**Table S3.** Formula form of strain and stress of electrochemical and thermal models.

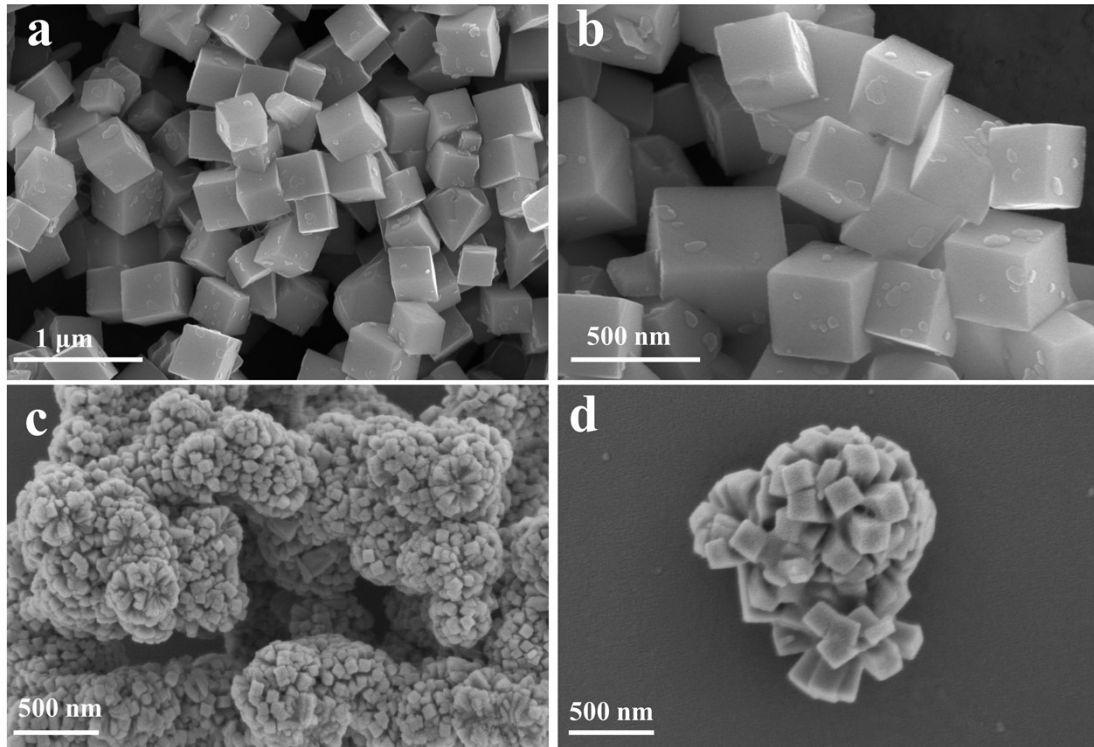

**Fig. S1.** SEM images of (a-b) hexahedral  $\text{Fe}_2\text{O}_3$  cubes; (c-d)  $\text{SnO}_2$  nanopillars

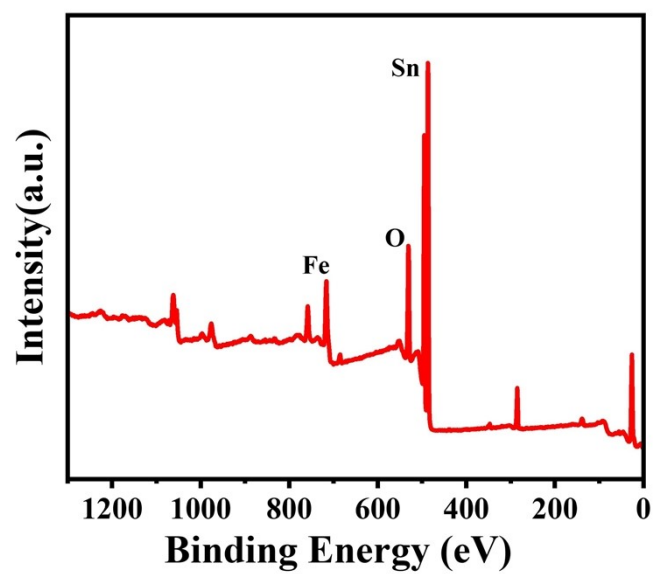

**Fig. S2.** The survey spectra of the hexahedral  $\text{Fe}_2\text{O}_3@\text{SnO}_2$  heterostructure.

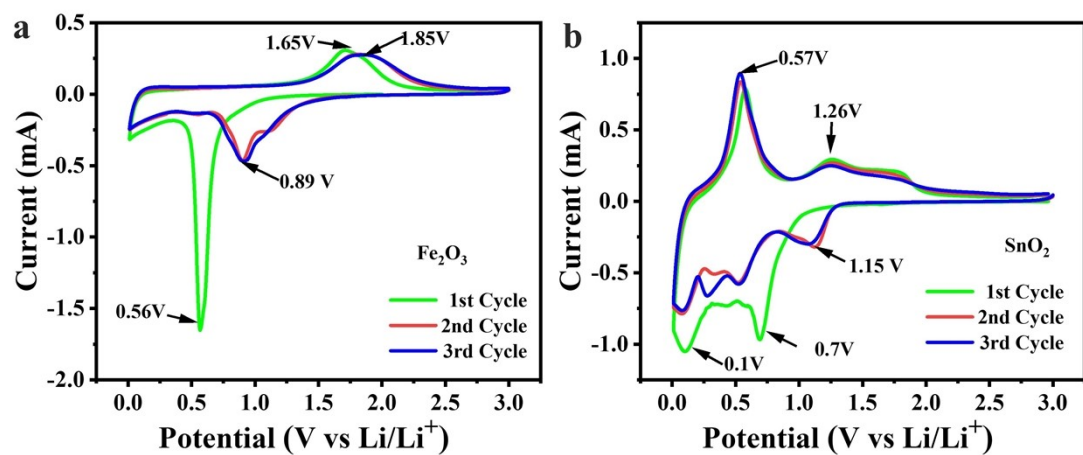

**Fig. S3.** CV curves of initial three cycles at scan rate 0.1 mV s<sup>-1</sup> of (a) hexahedral Fe<sub>2</sub>O<sub>3</sub> heterostructure; (b) SnO<sub>2</sub> nanopillars.

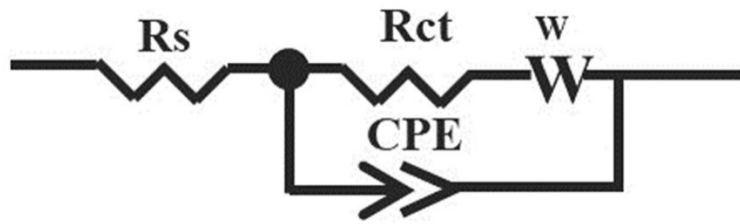

**Fig. S4.** The equivalent circuit of the three samples.

**Table S1.** Key parameters in the mechanical and electrochemical simulations.

| <b>Parameter</b> | <b>Value</b> | <b>Unit</b>        | <b>Definition</b>                                               |
|------------------|--------------|--------------------|-----------------------------------------------------------------|
| $T_{ref}$        | 293.15       | K                  | Reference temperature                                           |
| $\alpha_{fs}$    | 12.3E-5      | K <sup>-1</sup>    | Thermal expansion coefficient of Fe <sub>2</sub> O <sub>3</sub> |
| $\rho_{fs}$      | 2.33         | g cm <sup>-3</sup> | Density of Fe <sub>2</sub> O <sub>3</sub>                       |
| $E_{fs}$         | 140E-9       | Pa                 | Young's modulus of Fe <sub>2</sub> O <sub>3</sub>               |
| $\nu_{fs}$       | 0.256        | 1                  | Poisson's ratio of Fe <sub>2</sub> O <sub>3</sub>               |

**Table S2.** Hexahedral Fe<sub>2</sub>O<sub>3</sub>@SnO<sub>2</sub> heterostructure and other Fe-based anode reported in other recent literatures are used to LIBs' anode.

| <b>Material system</b>                             | <b>Specific Capacity</b>                           | <b>Reference</b>                                 |
|----------------------------------------------------|----------------------------------------------------|--------------------------------------------------|
| <b>Fe<sub>2</sub>O<sub>3</sub>@SnO<sub>2</sub></b> | <b>641.7 mAh g<sup>-1</sup>@4 A g<sup>-1</sup></b> | <b>This work</b>                                 |
| <b>H-Co<sub>3</sub>O<sub>4</sub>@MCNBs</b>         | 658 mAh g <sup>-1</sup> @2 A g <sup>-1</sup>       | Angew. Chem. Int. Ed. 59(45) (2020) 19914-19918. |
| <b>Co<sub>3</sub>O<sub>4</sub>@MnO<sub>2</sub></b> | 696 mAh g <sup>-1</sup> @1 A g <sup>-1</sup>       | Small 17(19) (2021) 9. 2008165.                  |
| <b>SF</b>                                          | 558.3 mAh g <sup>-1</sup> @5 A g <sup>-1</sup>     | Chem. Eng. J. 388 (2020) 8. 124119.              |
| <b>α-MoO<sub>3</sub>/SWCNH</b>                     | 654mAh g <sup>-1</sup> @1C                         | Adv. Energy Mater. 10(36) (2020) 14. 2001627.    |
| <b>d-H-Nb<sub>2</sub>O<sub>5</sub></b>             | 138mAh g <sup>-1</sup> @2 A g <sup>-1</sup>        | Energy Environ. Sci. 15(1) (2022) 254-264.       |
| <b>SnO<sub>2</sub>@MOF/graphene</b>                | 450 mAh g <sup>-1</sup> @1 A g <sup>-1</sup>       | Nano Energy 74 (2020) 10. 104868.                |
| <b>HoCo<sub>3</sub>O<sub>4</sub>/NS-RGO</b>        | 820 mAh g <sup>-1</sup> @5 A g <sup>-1</sup>       | ACS Nano 14(5) (2020) 5780-5787.                 |
| <b>V<sub>2</sub>O<sub>5</sub></b>                  | 318 mA h g <sup>-1</sup> @3 A g <sup>-1</sup>      | Nano Energy 78 (2020) 10. 105233.                |
| <b>LBL</b>                                         | 206 mAh g <sup>-1</sup> @4 A g <sup>-1</sup>       | Energy Stor. Mater. 38 (2021) 70-79.             |

**Table S3.** Formula form of strain and stress of electrochemical and thermal models.

|                       | <b>Strain</b>                                              | <b>Stress</b>                      |
|-----------------------|------------------------------------------------------------|------------------------------------|
| Electrochemical model | $\varepsilon_e = \beta(I - I_{ref}) = \beta\Delta I$ [1]   | $\sigma_t = E_e\beta\Delta I$ [2]  |
| Thermal model         | $\varepsilon_t = \alpha(T - T_{ref}) = \alpha\Delta T$ [3] | $\sigma_t = E_t\alpha\Delta T$ [4] |

## Reference

- [1] H. Yang, F. F. Fan, W. T. Liang, X. Guo, T. Zhu, S. L. Zhang, A chemo-mechanical model of lithiation in silicon, *J. Mech. Phys. Solids* 70 (2014) 349-361. <https://doi.org/10.1016/j.jmps.2014.06.004>.
- [2] H. M. Xie, Q. Zhang, H. B. Song, B. Q. Shi, Y. L. Kang, Modeling and in situ characterization of lithiation-induced stress in electrodes during the coupled mechano-electro-chemical process, *J. Power Sources* 342 (2017) 896-903. <https://doi.org/10.1016/j.jpowsour.2017.01.017>.
- [3] M. Wang, X. R. Xiao, Investigation of the chemo-mechanical coupling in lithiation/delithiation of amorphous Si through simulations of Si thin films and Si nanospheres, *J. Power Sources* 326 (2016) 365-376. <https://doi.org/10.1016/j.jpowsour.2016.07.011>.
- [4] D. A. Cui, M. J. Cheng, Thermal stress modeling of anode supported micro-tubular solid oxide fuel cell, *J. Power Sources* 192(2) (2009) 400-407. <https://doi.org/10.1016/j.jpowsour.2009.03.046>.
